# Supplementary material
Source: PubMed Central journal article supplement (PMC4580610)
Supplement: supp_dc15-0783v150783_DC150783SupplementaryData.pdf [file supp_dc15-0783v150783_DC150783SupplementaryData.pdf]

SUPPLEMENTARY DATA

**Supplementary Figure S1. (A) Distribution of fracture site differed in participants with type 1 diabetes compared to participants without diabetes. (B) Lower extremity fractures comprised a greater percentage of all fractures in participants with T1D.**

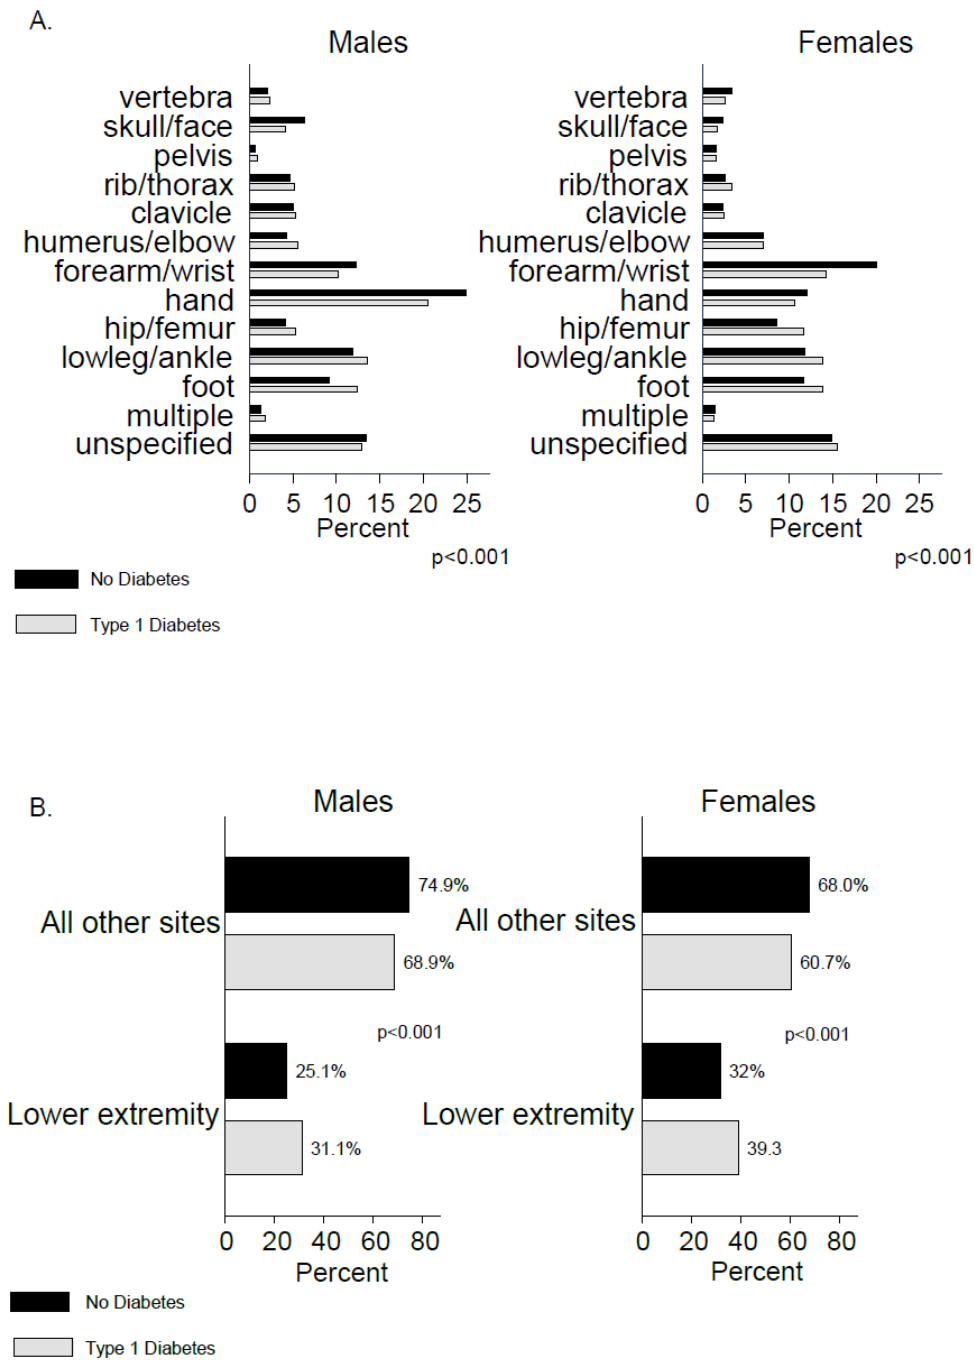

SUPPLEMENTARY DATA

**Supplementary Table S1. Adjusted hazard ratios for incident fracture among participants with type 1 diabetes**

| <b>Males (n=13,850)</b>                          |                                |          | <b>Females (n=10,683)</b>           |                    |          |
|--------------------------------------------------|--------------------------------|----------|-------------------------------------|--------------------|----------|
|                                                  | <b>HR (95% CI)<sup>1</sup></b> | <b>p</b> |                                     | <b>HR (95% CI)</b> | <b>p</b> |
| <b>Average HbA1c</b>                             | 1.05 (1.02-1.10)               | 0.01     | <b>Average HbA1c</b>                | 1.11 (1.06-1.16)   | <0.001   |
| <b>Interval Age</b>                              | 0.99 (0.98-0.99)               | <0.001   | <b>Interval Age</b>                 | 1.02 (1.01-1.03)   | <0.001   |
| <b>CKD</b>                                       | 1.29 (1.05-1.61)               | 0.02     | <b>CKD</b>                          | 1.41 (1.19-1.66)   | <0.001   |
| <b>Retinopathy</b>                               | 1.13 (1.01-1.28)               | 0.046    | <b>Steroid use</b>                  | 1.23 (1.07-1.41)   | 0.01     |
| <b>Neuropathy</b>                                | 1.33 (1.03-1.72)               | 0.03     | <b>Celiac disease</b>               | 1.80 (1.18-2.76)   | 0.01     |
|                                                  |                                |          | <b>Prior Fracture</b>               | 1.78 (1.54-2.10)   | <0.001   |
|                                                  |                                |          | <b>Neuropathy</b>                   | 1.52 (1.19-1.92)   | 0.001    |
| <b>Adjustment for smoking status and obesity</b> |                                |          |                                     |                    |          |
| <b>Males (n=6961)<sup>1</sup></b>                |                                |          | <b>Females (n=5471)<sup>2</sup></b> |                    |          |
| <b>Average HbA1c</b>                             | 1.06 (0.99-1.13)               | 0.08     | <b>Average HbA1c</b>                | 1.07 (1.01-1.14)   | 0.04     |
| <b>Interval Age</b>                              | 1 (0.99-1.01)                  | 0.15     | <b>Interval Age</b>                 | 1.03 (1.01-1.03)   | <0.001   |
| <b>CKD</b>                                       | 1.21 (0.91-1.62)               | 0.21     | <b>Steroid use</b>                  | 1.16 (0.94-1.43)   | 0.16     |
| <b>Ever Smoker</b>                               | 1.25 (1.05-1.49)               | 0.01     | <b>Celiac disease</b>               | 1.89 (1.04-3.46)   | 0.04     |
| <b>BMI</b>                                       | 0.97 (0.95-0.99)               | 0.01     | <b>Prior Fracture</b>               | 1.91 (1.55-2.35)   | <0.001   |
| <b>Retinopathy</b>                               | 1.29 (1.08-1.55)               | 0.01     | <b>Ever Smoker</b>                  | 1.15 (0.94-1.39)   | 0.15     |
| <b>Neuropathy</b>                                | 1.42 (1.01-1.99)               | 0.04     | <b>BMI</b>                          | 0.97 (0.95-0.99)   | 0.01     |
|                                                  |                                |          | <b>Neuropathy</b>                   | 1.98 (1.43-2.75)   | <0.001   |

<sup>1</sup>stratified by prior fracture

<sup>2</sup>stratified by CKD
